# Supplementary material for: Novel complex-coprecipitation route to form high quality triethanolamine-coated Fe3O4 nanocrystals: Their high saturation magnetizations and excellent water treatment properties
Source: Royal Society of Chemistry journal article supplement (doi:10.1039/c2ce25813g), 2012-01-01
Supplement: c2ce25813g.pdf [file c2ce25813g.pdf]

# **Novel complex-coprecipitation route to form high quality triethanolamine-coated Fe<sub>3</sub>O<sub>4</sub> nanocrystals: their high saturation magnetizations and excellent water treatment properties**

**Tian Xia,<sup>\*a</sup> Jingping Wang,<sup>\*b</sup> Chunli Wu,<sup>b</sup> Fuchang Meng,<sup>a</sup> Zhan Shi,<sup>a</sup> Jie Lian,<sup>a</sup> Jing Feng<sup>b</sup> and Jian Meng<sup>c</sup>**

<sup>a</sup> *Key Laboratory of Functional Inorganic Materials Chemistry, Ministry of Education, School of chemistry,*

*Chemical Engineering and Materials, Heilongjiang University, Harbin 150080, P. R. China. Fax: 86 451 8660*

*8426; Tel: 86 451 8660 8426; E-mail: [xiatian0621@yahoo.com.cn](mailto:xiatian0621@yahoo.com.cn)*

<sup>b</sup> *Key Laboratory of Superlight Materials and Surface Technology, College of Materials Science and Chemical*

*Engineering, Harbin Engineering University, Harbin 150001, P. R. China.*

<sup>c</sup> *State Key Laboratory of Rare Earth Resource Utilization, Changchun Institute of Applied Chemistry, Changchun,*

*130022, P. R. China*

## Experimental

### Synthesis

Chemicals:  $\text{Fe}_2(\text{SO}_4)_3$  (99.9%),  $\text{FeSO}_4 \cdot 7\text{H}_2\text{O}$  (99%), triethanolamine (TEA, 98%), NaOH (99.9%) and  $\text{K}_2\text{Cr}_2\text{O}_7$  (99.5%) were purchased from Beijing Fine Chemical Company, and HCl was commercially available analytical grade. All chemicals were used as received without further purification.

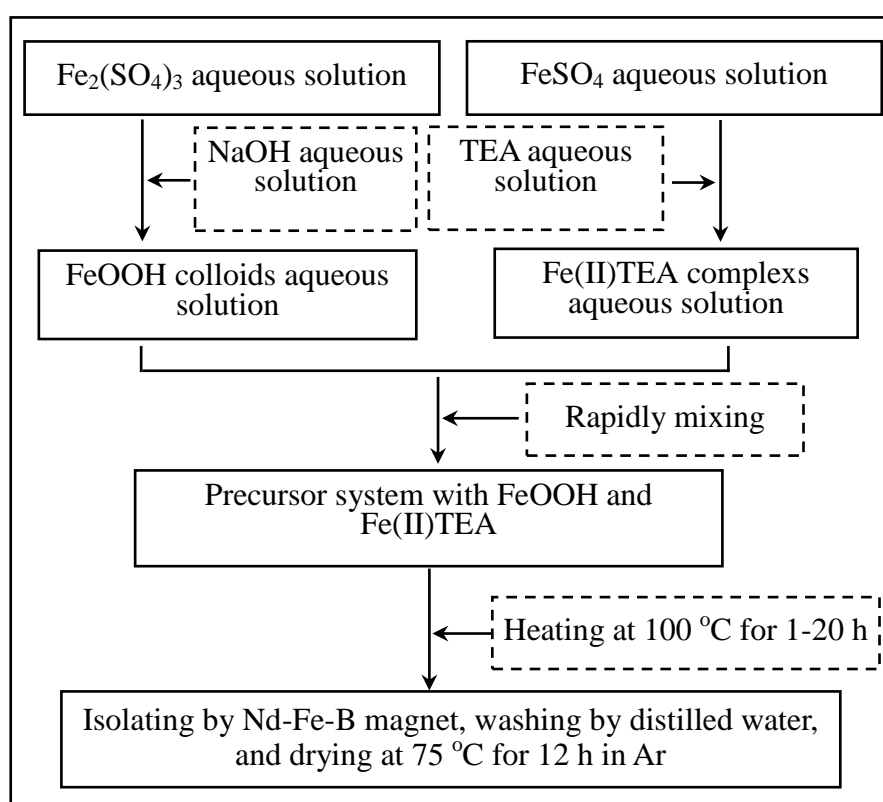

**Scheme S1** Experimental flowchart for the synthesis of the  $\text{Fe}_3\text{O}_4$  NCs by a complex-coprecipitation route.

The overall synthetic procedure is presented in Scheme S1. In a typical synthesis,  $\text{Fe}_2(\text{SO}_4)_3$  (0.3599 g, 0.9 mmol),  $\text{FeSO}_4 \cdot 7\text{H}_2\text{O}$  (0.3336 g, 1.2 mmol), TEA (0.8951 g,

6 mmol) and NaOH (1.44 g, 36 mmol) were each dissolved into 10 mL, 10 mL, 5 mL and 5 mL distilled water under magnetic stirring. Subsequently, NaOH and TEA solutions were added into the  $\text{Fe}_2(\text{SO}_4)_3$  and  $\text{FeSO}_4$  solutions to form the  $\text{FeOOH}$  colloid and Fe(II)-TEA complex solutions with stirring for 5 min, respectively. The above solutions were rapidly mixed and transferred in a poly(tetrafluoroethylene) (PTFE) beaker (inner volume of 40 ml) covered by the plastic preservative film, followed by heating at 100 °C and holding for various times (1, 4, 7 and 20 h) in an digital oven. Then the solution was naturally cooled down to room temperature. The black powder was obtained and isolated by Nd-Fe-B magnet, and washed several times by distilled water. Finally the as-prepared products were dried at 75 °C for 12 h under Ar atmosphere. The samples prepared at different reaction times were denoted as M-reaction time, M1, M4, M7 and M20.

### **Characterization**

The powder X-ray diffraction (XRD) pattern of the products was performed on a Rigaku D/MAX-2500 diffractometer with Cu  $K\alpha$  radiation ( $\lambda = 1.5406 \text{ \AA}$ ). Transmission electron microscopy (TEM), high-resolution transmission electron microscopic (HRTEM) images and selected area electron diffraction (SAED) patterns were obtained on a FEI TF30 microscope operated at 300 kV. X-ray photoelectron spectroscopy (XPS) measurements were performed using a high performance AXIS 165 X-ray photoelectron spectrometer (UK, KRATOS). Fourier transform infrared spectra (FTIR) were measured on a Bruker EQUINOX55 FTIR spectrometer using

KBr pressed pellet technique.

The magnetic measurements were carried out on a superconducting quantum interference device (SQUID) magnetometer (LakeShore 7303) at 300 K and 2 K. For the water treatment experiments,  $K_2Cr_2O_7$  was used as the source of Cr (VI). The concentration of Cr (VI) ions was  $8 \text{ mg L}^{-1}$ , and the pH value of the aqueous solution was adjusted to 3 using HCl. Then, 0.01 g of the absorbent sample was added to 8 mL of the above solution under stirring at room temperature (300 K). After a specified time, the solid absorbent and liquid were separated and Inductively Coupled Plasma-Mass Spectroscopy (ICP-MS) (Thermal Electron, XSeries II) was used to measure the chromium concentration in the remaining solution.

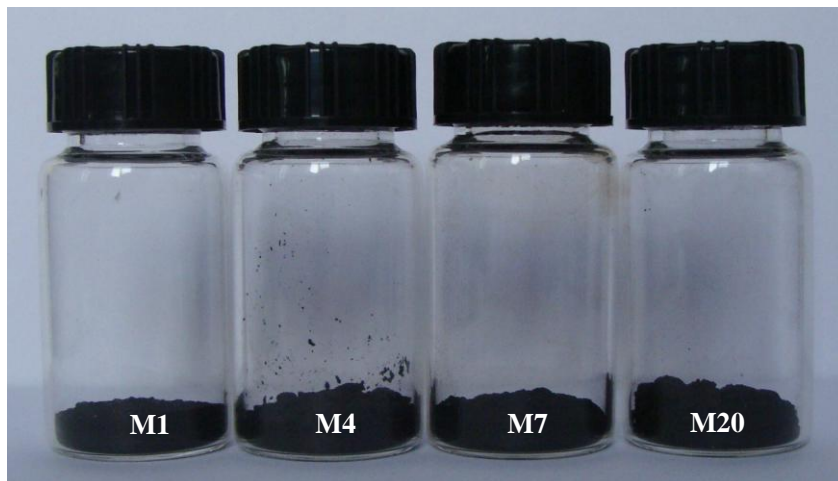

**Fig. S1** Photographs of as-prepared Fe<sub>3</sub>O<sub>4</sub> NCs with different reaction times (M1, M4, M7 and M20).

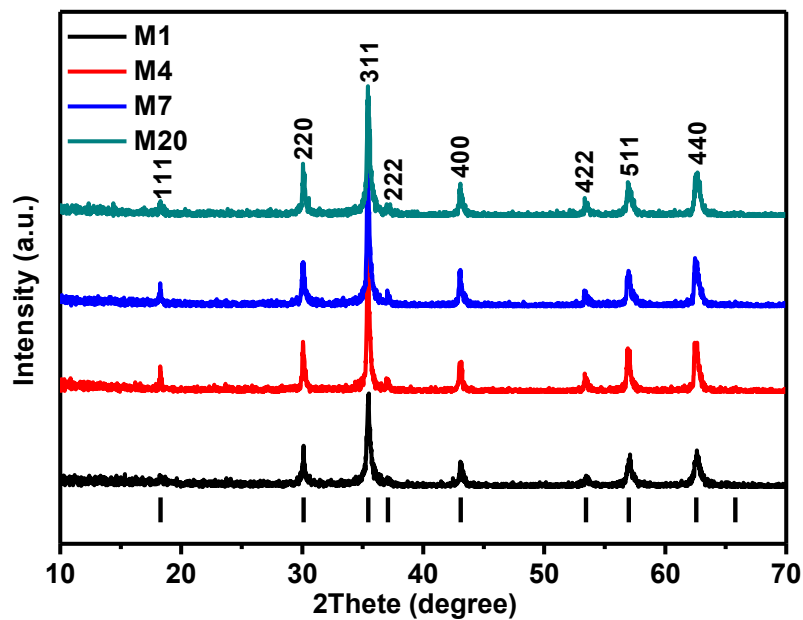

**Fig. S2** XRD patterns of M1, M4, M7 and M20. The vertical bars at the bottom indicate the JCPDS data (JCPDS card no. 19-0629) for magnetite.

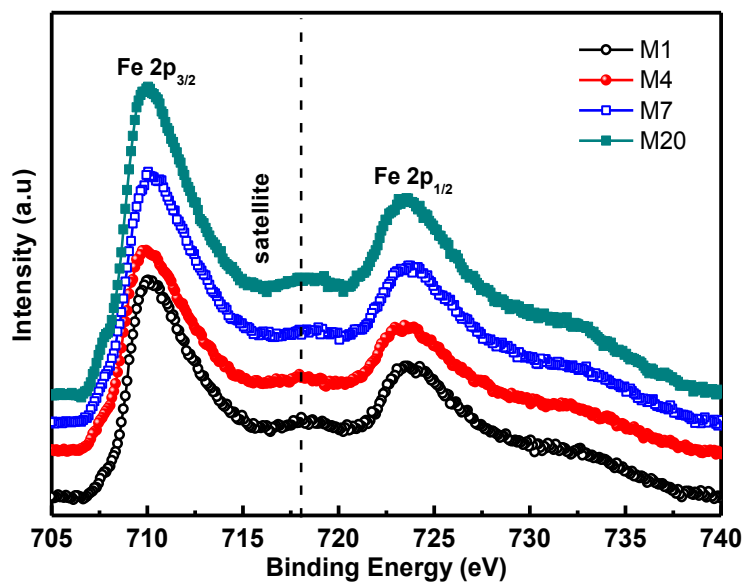

Fig. S3 XPS spectra of M1, M4, M7 and M20.

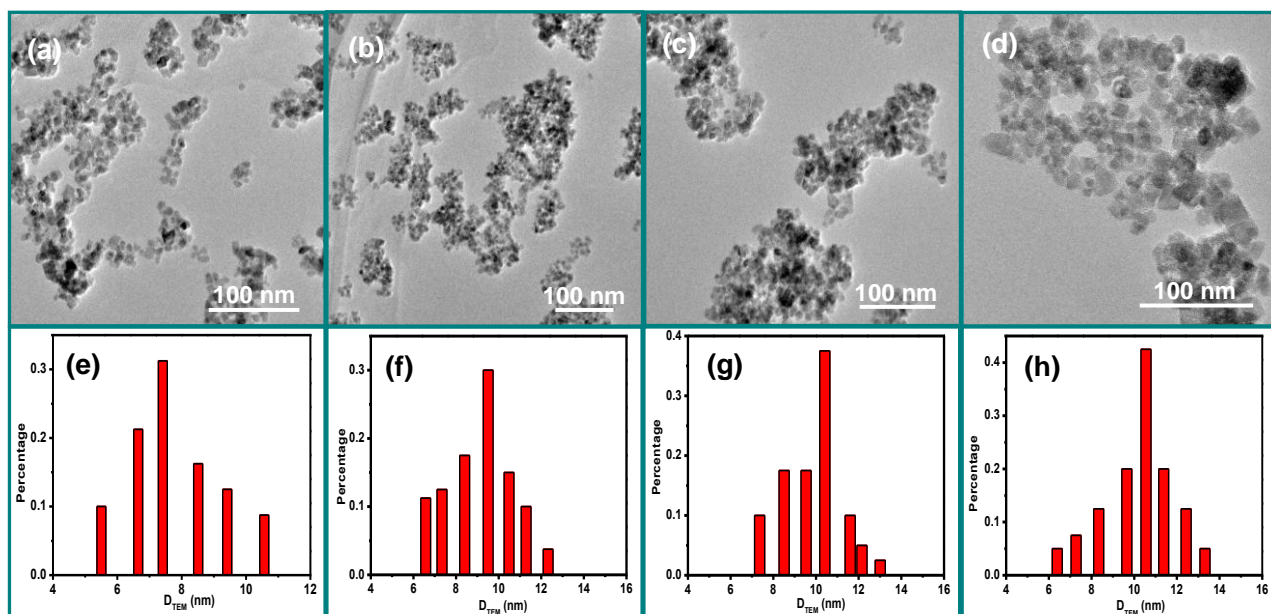

**Fig. S4** TEM micrographs (a-d) of the Fe<sub>3</sub>O<sub>4</sub> NCs and their corresponding particle size distribution histograms (e-h): (a)  $7.8 \pm 1.4$  nm for M1, (b)  $9.1 \pm 1.6$  nm for M4, (c)  $9.9 \pm 1.4$  nm for M7, (d)  $10.2 \pm 1.7$  nm for M20.



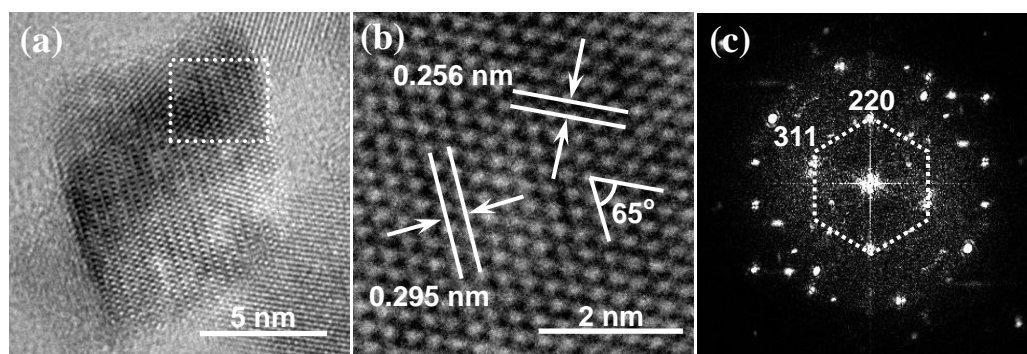

**Fig. S5** (a) High-magnification TEM image of an individual Fe<sub>3</sub>O<sub>4</sub> octahedron. (b) HRTEM image recorded from the rectangular part of nano-octahedron in (a) and (c) its corresponding FFT pattern.

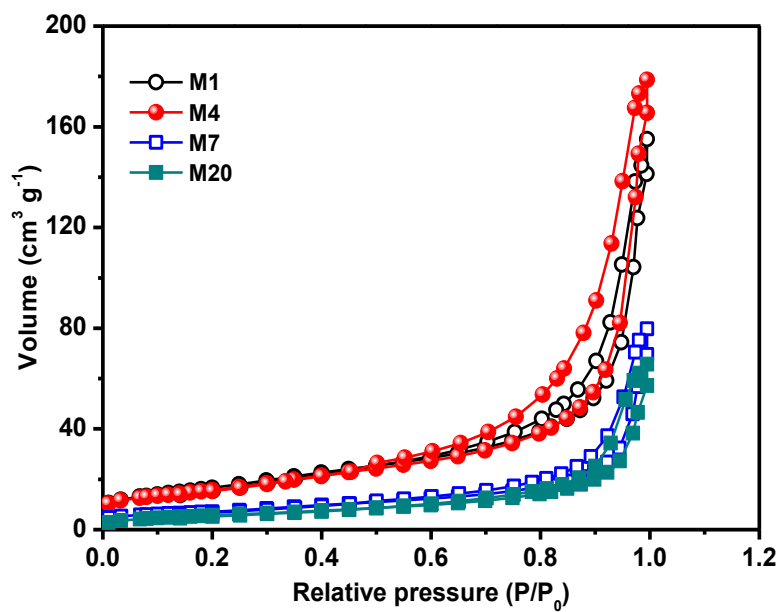

**Fig. S6** Nitrogen adsorption and desorption isotherms of the Fe<sub>3</sub>O<sub>4</sub> NCs: M1 (60.3 m<sup>2</sup> g<sup>-1</sup>), M4 (56.1 m<sup>2</sup> g<sup>-1</sup>), M7 (25.6 m<sup>2</sup> g<sup>-1</sup>) and M20 (20.9 m<sup>2</sup> g<sup>-1</sup>).

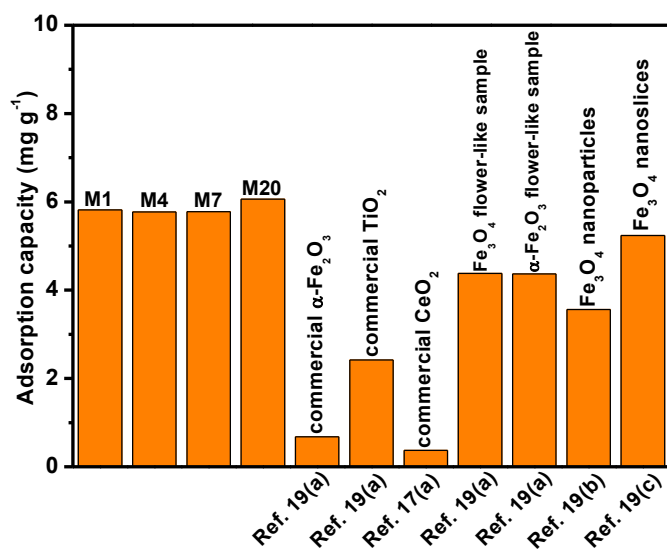

**Fig. S7** Comparison of Cr (VI) adsorption capacity for the Fe<sub>3</sub>O<sub>4</sub> NCs prepared in this work and some oxide adsorbents taken from the references.

References:

17 (a) J. S. Hu, L. S. Zhong, W. G. Song and L. J. Wan, *Adv. Mater.*, 2008, **20**, 2977.

19 (a) L. S. Zhong, J. S. Hu, H. P. Liang, A. M. Cao, W. G. Song and L. J. Wan, *Adv. Mater.*, 2006,

**18**, 2426; (b) Y. C. Sharma and V. Srivastava, *J. Chem. Eng. Data*, 2011, **56**, 819; (c) J. P.

Wang, T. Xia, C. L. Wu, J. Feng, F. C. Meng, Z. Shi and J. Meng, *RSC Adv.*, 2012, **2**, 4220.
